# Supplementary material
Source: PubMed Central journal article supplement (PMC3416563)
Supplement: JB.00367-12_zjb999091715so1.pdf [file JB.00367-12_zjb999091715so1.pdf]

TABLE S1. Primers used for this study

|                             |                                  |
|-----------------------------|----------------------------------|
| <i>bhuQ</i> -1F             | 5'-GACATTTTCGCTGAAGACATA -3'     |
| <i>bhuQ</i> -1R             | 5'-GAGCTTACTTTACCGTTGGC-3'       |
| <i>bhuQ</i> -2F             | 5'-TCTATGCATCCCACACAGTC-3'       |
| <i>bhuQ</i> -2R             | 5'-GAGCTGGGAGTCACGGTTCT-3'       |
| <i>amp</i> - F              | 5'-TATTTTCGTTCCATCCATA-3'        |
| <i>amp</i> - R              | 5'-GTTTTCCAATGATGAGC-3'          |
| <i>Kan</i> R                | 5'-CCACTCCAGCATGAGAT-3'          |
| <i>bhuQ</i> -3F             | 5'-ACTGGATCCCGGAGCTGTTTCTATTC-3' |
| <i>bhuQ</i> -3R             | 5'-ACTGTCGACTTCTAAATATGAGTTAA-3' |
| 16S Fwd                     | 5'-TCTCACGACACGAGCTGACG-3'       |
| 16S Rev                     | 5'-CGCAGAACCTTACCAGCCCT-3'       |
| <i>dhbC</i> Fwd             | 5'-GTGCCAAGCTTGGTCTGTACTTC-3'    |
| <i>dhbC</i> Rev             | 5'-CGTGGATTGTTTACCGGC-3'         |
| <i>bhuQ</i> Fwd             | 5'-CGGTAGCGAAACCGATTTTGAGAC-3'   |
| <i>bhuQ</i> Rev             | 5'-ATGCGCATGGCGAAACTGTT-3'       |
| <i>rirA</i> F               | 5'-GCACCGCAGAAAATGGCCGA-3'       |
| <i>rirA</i> R               | 5'-TGGAACATTCCCGAACCGGA-3'       |
| Rev                         | 5'-GAAGGCATTGAGTGCTTCGC-3'       |
| Ybak/ <i>rirA</i> F         | 5'-TAAAGGTGAGAAAAGGTTTC-3'       |
| Ybak/ <i>rirA</i> R         | 5'-GACGCATGATTATTCCTTTT-3'       |
| <i>rirA</i> / <i>bhuQ</i> F | 5'-GGATAGCTGTGGCCTGAATG-3'       |
| <i>rirA</i> / <i>bhuQ</i> R | 5'-GAGCTGGGAGTCACGGTTCT-3'       |
| <i>bhuQ</i> / <i>bfr</i> F  | 5'-GCTTCCGTATCGTCACTTTT-3'       |
| <i>bhuQ</i> / <i>bfr</i> R  | 5'-GAGCTTACTTTACCGTTGGC-3'       |
| <i>rirA</i> F               | 5'-GCACCGCAGAAAATGGCCGA-3'       |
| <i>rirA</i> R               | 5'-TGGAACATTCCCGAACCGGA-3'       |
